# Supplementary material for: Broad Bactericidal Activity of the Myoviridae Bacteriophage Lysins LysAm24, LysECD7, and LysSi3 against Gram-Negative ESKAPE Pathogens
Source: PubMed Central journal article supplement (PMC6466606; doi:10.3390/v11030284), 2019-03-21
Supplement: viruses-11-00284-s001.pdf [file viruses-11-00284-s001.pdf]

# Supplementary Materials

**Table S1.** Sequences of all primers used.

| # | Target gene | Direction | 5'-PrimerSequence-3'                                |
|---|-------------|-----------|-----------------------------------------------------|
| 1 | LysAm24     | Forward   | 5'-AAGAAGGAGATATACATATGGACATTTTAAAAATTTAACTCTC-3'   |
|   |             | Reverse   | 5'-TGGTGGTGGTGGTGGCTCGAGTTTTAAAAATAAATCCTTTTCTGC-3' |
| 2 | LysECD7     | Forward   | 5'-AAGAAGGAGATATACATATGTTTTAAATTATCTCAAAGAAGCA-3'   |
|   |             | Reverse   | 5'-TGGTGGTGGTGGTGGCTCGAGTTTGGATCTGGGTATTGCT-3'      |
| 3 | LysSi3      | Forward   | 5'-AAGAAGGAGATATACATATGCAACTCTCAAGAAAAGGT-3'        |
|   |             | Reverse   | 5'-TGGTGGTGGTGGTGGCTCGAGCTTTGGGTATACACTGTCAAGATA-3' |
